# Supplementary material
Source: PubMed Central journal article supplement (PMC4968396)
Supplement: mmc1.pdf [file mmc1.pdf]

**Biophysical Journal, Volume 111**

**Supplemental Information**

**Extended Electron-Transfer in Animal Cryptochromes Mediated by a  
Tetrad of Aromatic Amino Acids**

**Daniel Nohr, Sophie Franz, Ryan Rodriguez, Bernd Paulus, Lars-Oliver Essen, Stefan  
Weber, and Erik Schleicher**

# Extended Electron-Transfer Pathways in Animal Cryptochromes Mediated by a Tetrad of Aromatic Amino Acids

## -Supporting Information-

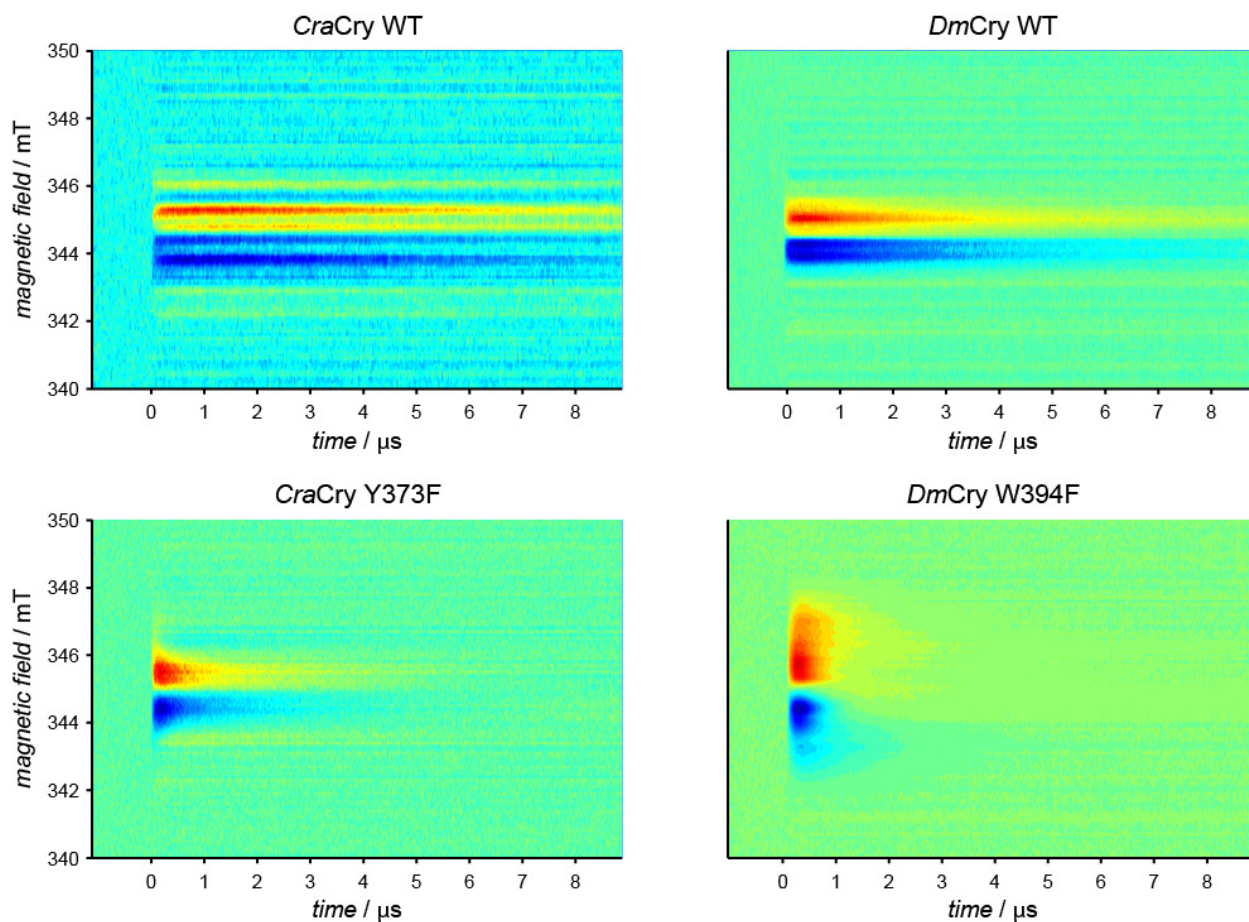

Supporting Figure 1: Complete trEPR data set of *CraCry* WT, *CraCry* Y373F, *DmCry* WT and *DmCry* W394F measured at 270 K.

Each time profile is the average of 100 acquisitions recorded with a laser pulse repetition rate of 1 Hz, a microwave frequency of 9.68 GHz, and a power of 2 mW at a detection bandwidth of 25 MHz. A: enhanced absorption; E: emission.

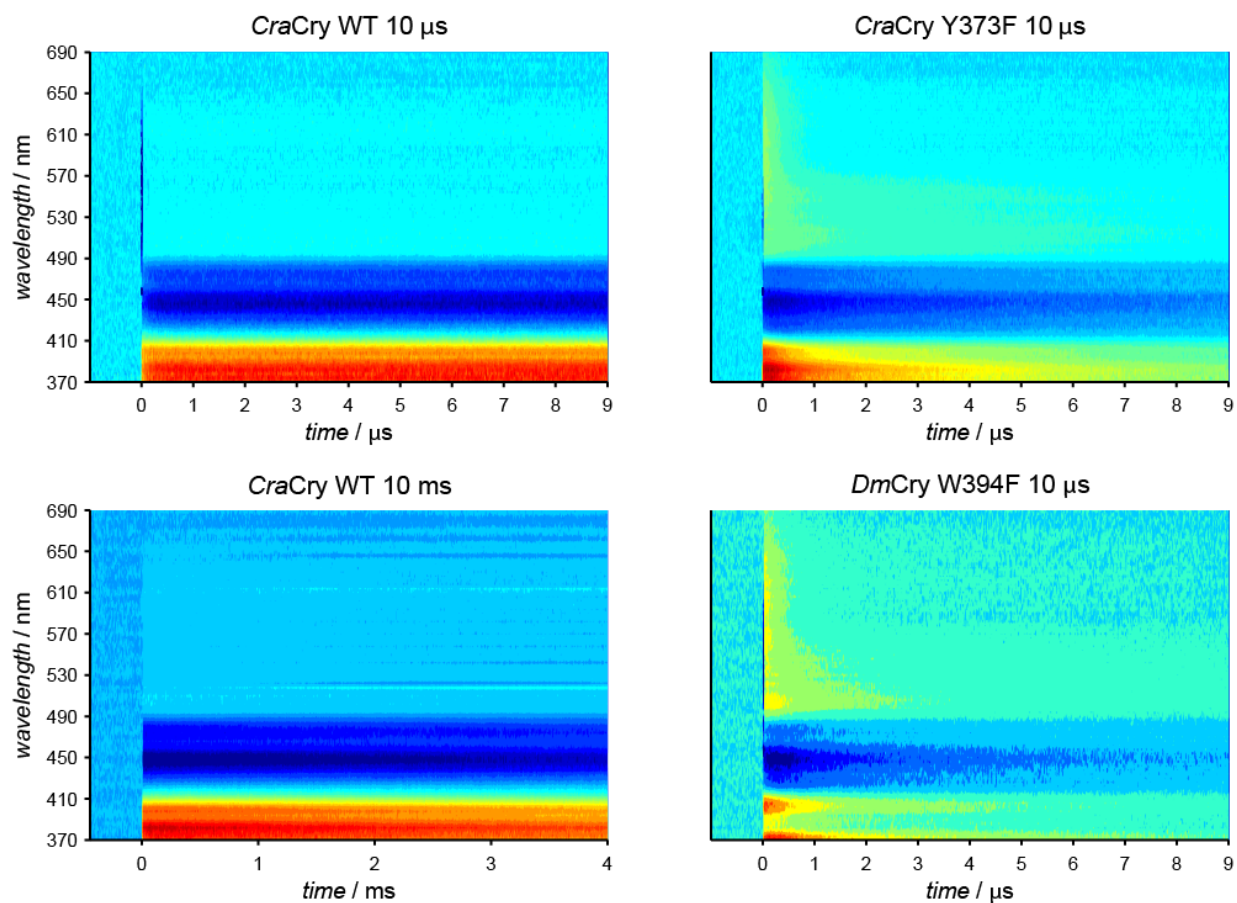

**Supporting Figure 2:** Transient optical spectroscopy of *CraCry* WT, *CraCry* Y373F, and *DmCry* W394F. Full 2-dimensional plots recorded at different time windows (from 10  $\mu\text{s}$  up to 10 ms) with a laser pulse power of 4 mJ and a repetition rate of 6.67 MHz. Three accumulations have been averaged.

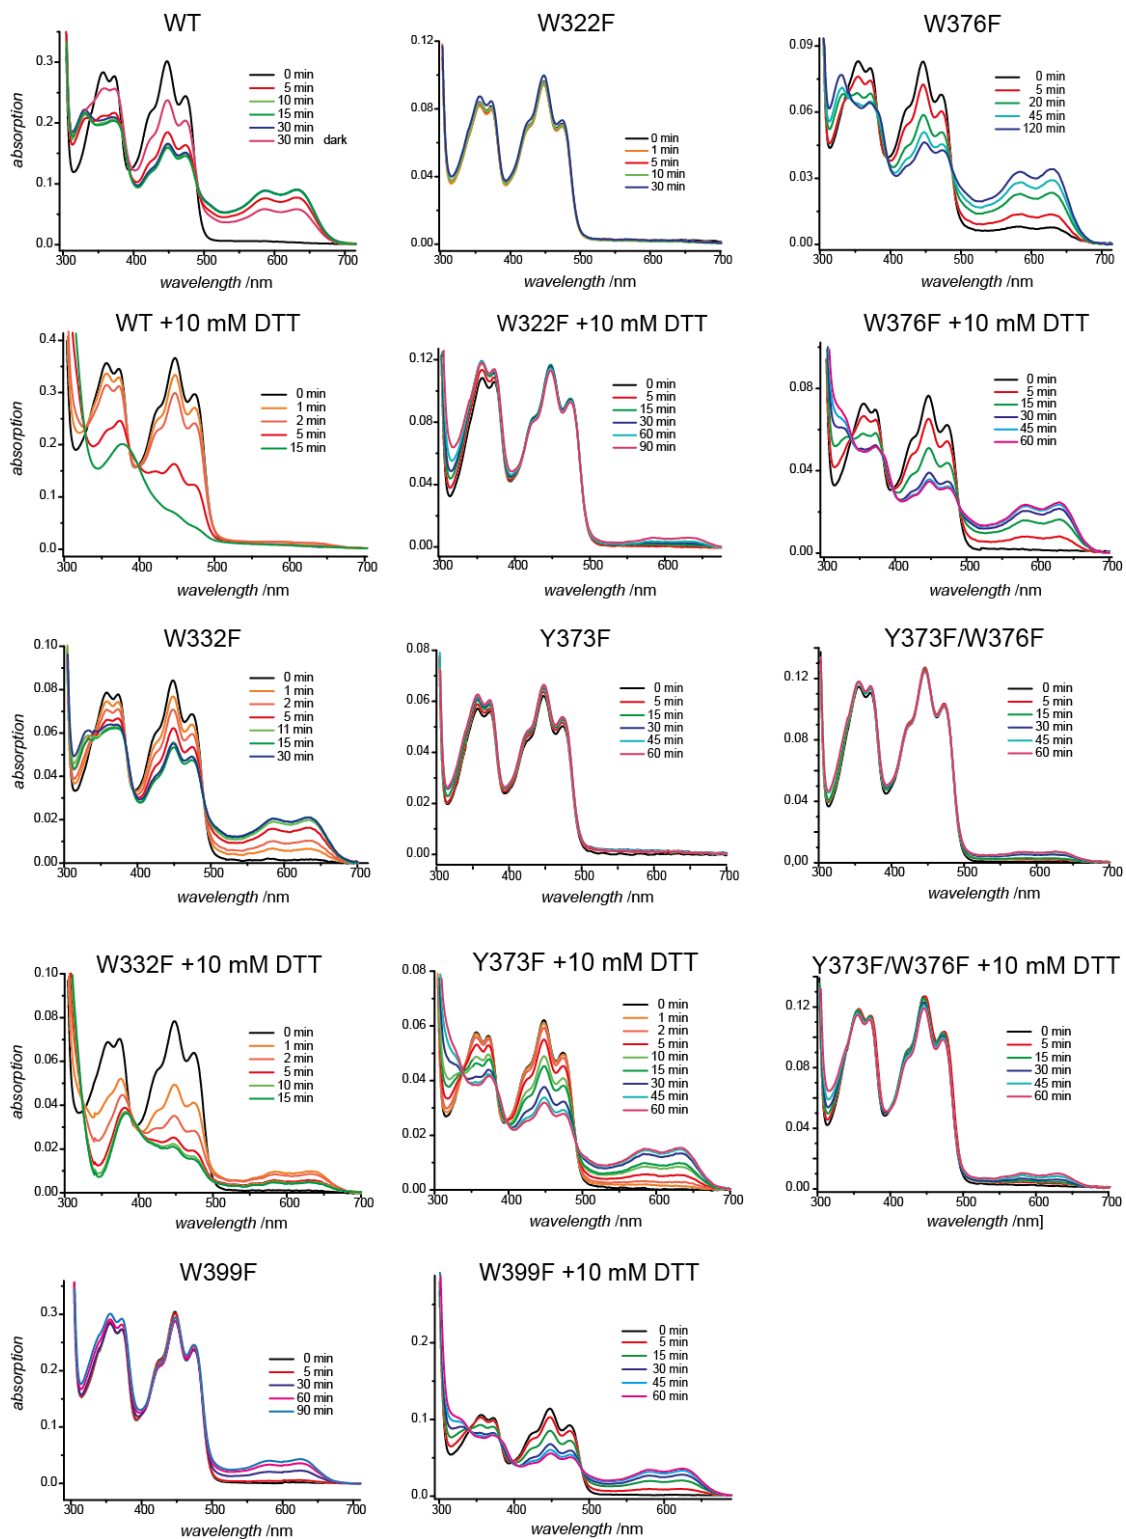

**Supporting Figure 3:** Blue-light induced spectral changes in the optical absorptions of WT and mutant *CraCrys* in the absence and presence of DTT as reduction agent. All measurements were performed under aerobic conditions.

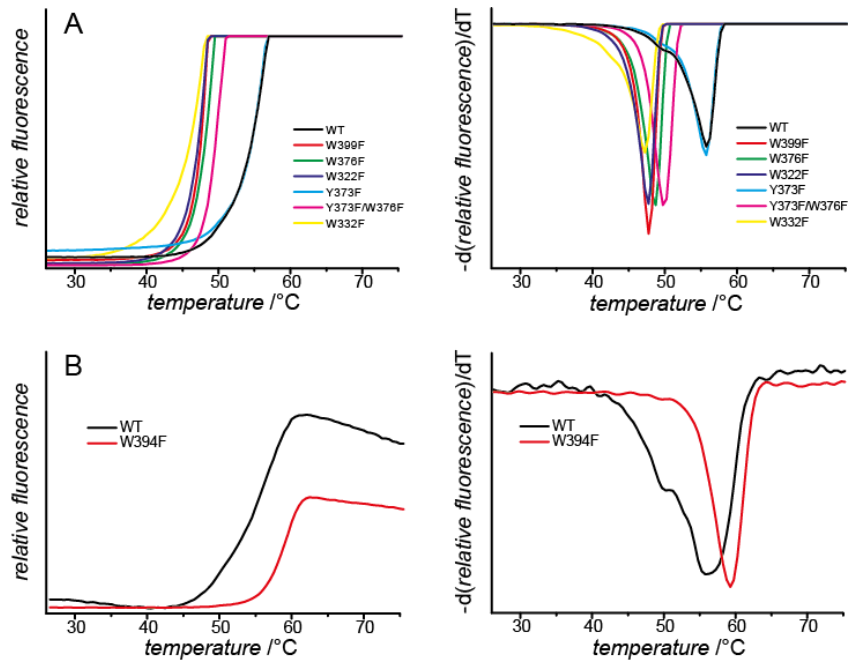

**Supporting Figure 4:** Thermo fluorescence measurements of *CraCry* (A) and *DmCry* (B) together with its derivation. For excitation a wavelength range between 470 and 480 nm was chosen and for detection of the FAD fluorescence a green emission filter (510–515 nm) was used. For controlled melting of the protein, the temperature was increased from 25–99 °C in 0.5 °C steps.
